# Supplementary material for: The SARS-CoV-2 Alpha variant exhibits comparable fitness to the D614G strain in a Syrian hamster model
Source: PubMed Central journal article supplement (PMC8913834; doi:10.1038/s42003-022-03171-9), 2022-03-10
Supplement: 42003_2022_3171_MOESM2_ESM.pdf [file 42003_2022_3171_MOESM2_ESM.pdf]

## Description of Additional Supplementary Files

**File name:** Supplementary Data 1

**Description:** Comparison experiment (Figure 1.b-g and Supplementary Figure 2.a)
